# Supplementary material for: A Ag–Pd alloy supported on an amine-functionalized UiO-66 as an efficient synergetic catalyst for the dehydrogenation of formic acid at room temperature
Source: Royal Society of Chemistry journal article supplement (doi:10.1039/c5cy01190f), 2015-09-02
Supplement: c5cy01190f1.pdf [file c5cy01190f1.pdf]

## **ELECTRONIC SUPPORTING INFORMATION (ESI)**

### **Ag-Pd alloy supported on amine-functionalized UiO-66 as an efficient synergetic catalyst for dehydrogenation of formic acid at room temperature**

Shu-Tao Gao, Weihua Liu, Cheng Feng\*, Ning-Zhao Shang, Chun Wang\*

$$x_a = \frac{P_{atm} V_{H_2} / RT}{n_{FA}} \quad \text{Equation S1}$$

Where  $x_a$  is conversion,  $P_{atm}$  is the atmospheric pressure,  $V_{H_2}$  is the final generated volume of  $H_2$ ,  $R$  is the universal gas constant,  $T$  is room temperature (298K), and  $n_{FA}$  is the mole number of FA.

$$TOF = \frac{P_{atm} V_{H_2} / RT}{n_{Ag+Pd} t} \quad \text{Equation S2}$$

Where  $TOF$  is turnover frequency at a certain conversion of FA to  $H_2$ ,  $V_{H_2}$  is the generated volume of  $H_2$ ,  $n_{Ag+Pd}$  is the mole number of the Ag and Pd, and  $t$  is the reaction time.

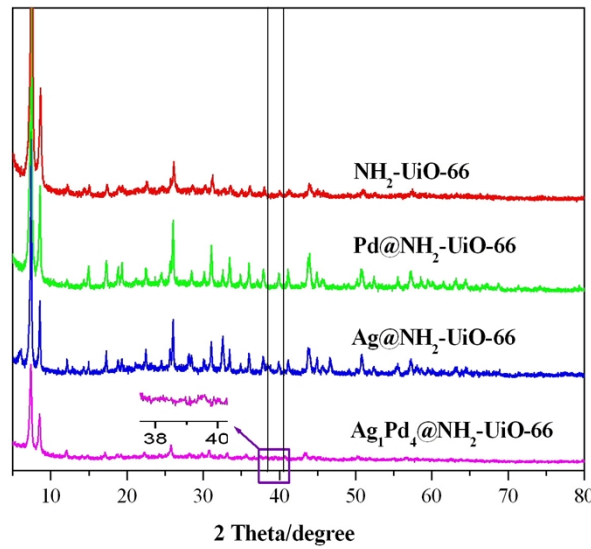

**Figure S1** Powder X-ray diffraction patterns for  $NH_2$ -UiO-66,  $Pd@NH_2$ -UiO-66(5 wt%),  $Ag@NH_2$ -UiO-66(5 wt%),  $Ag_1Pd_4@NH_2$ -UiO-66(5 wt%).

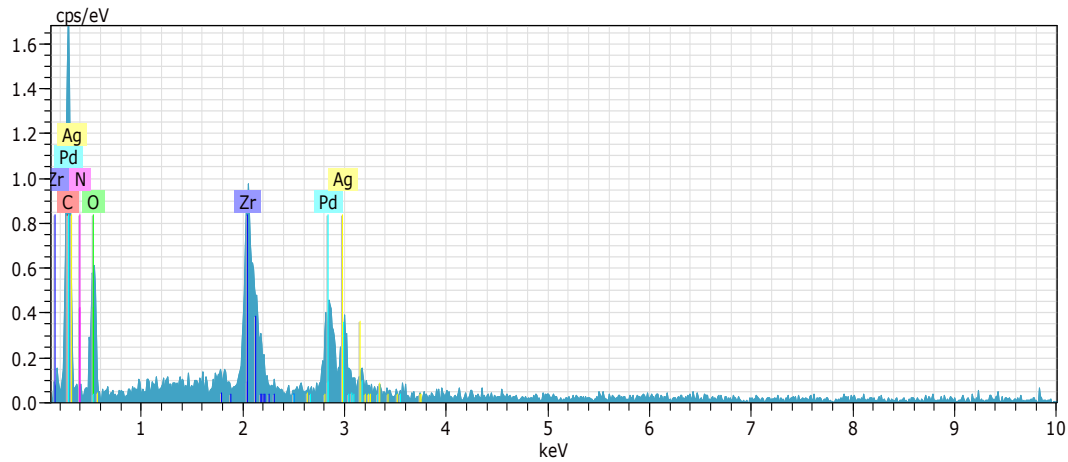

**Figure S2** Energy-dispersive X-ray (EDX) spectrum of  $Ag_1Pd_4@NH_2$ -UiO-66.

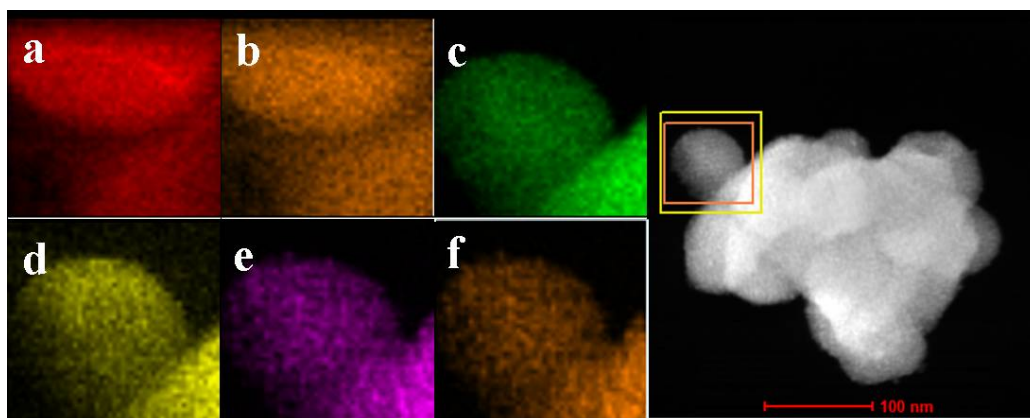

**Figure S3** The corresponding elemental mapping for (a) C, (b) N, (c) Zr, (d) O, (e) Pd and (f) Ag elements and HAADF-STEM image of (g)  $\text{Ag}_1\text{Pd}_4@\text{NH}_2\text{-UiO-66}$ .

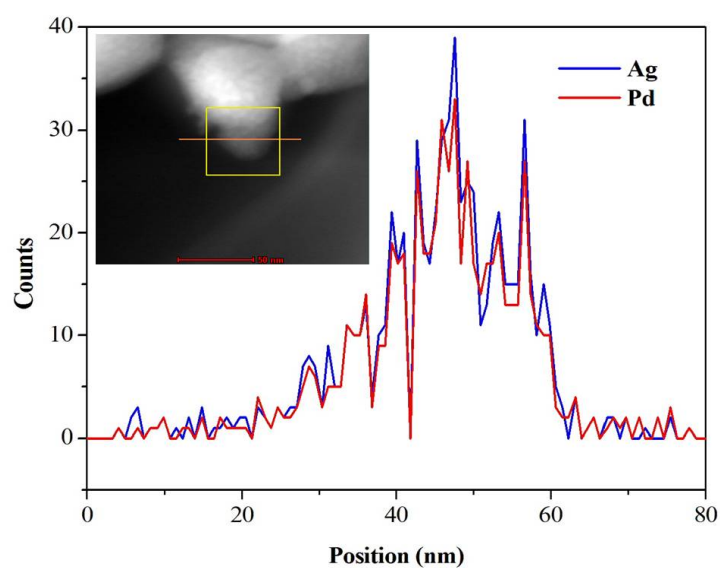

**Figure S4** STEM-EDS line-scan EDS spectra of  $\text{Ag}_1\text{Pd}_4@\text{NH}_2\text{-UiO-66}$ .

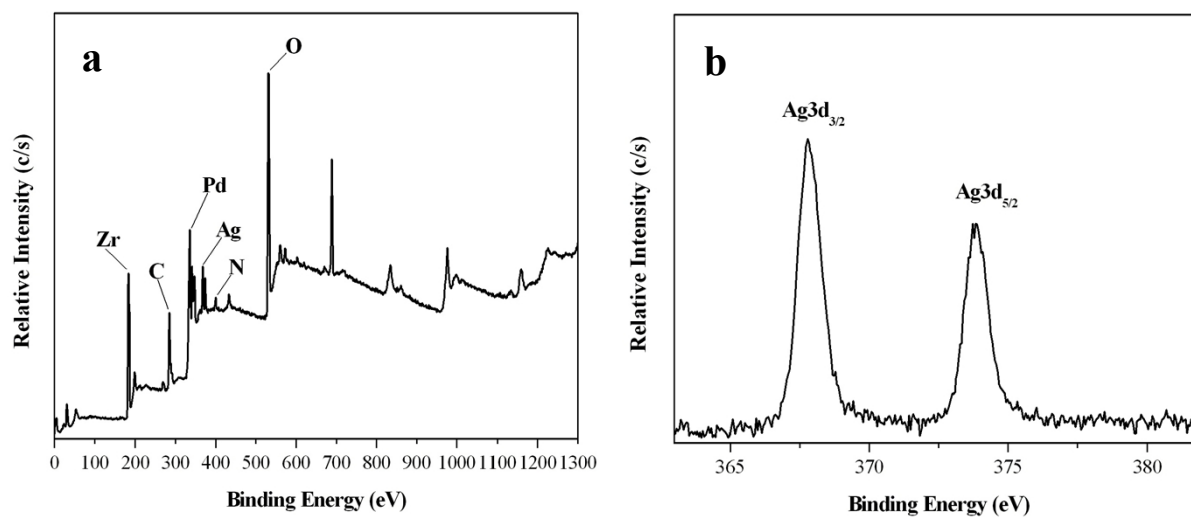

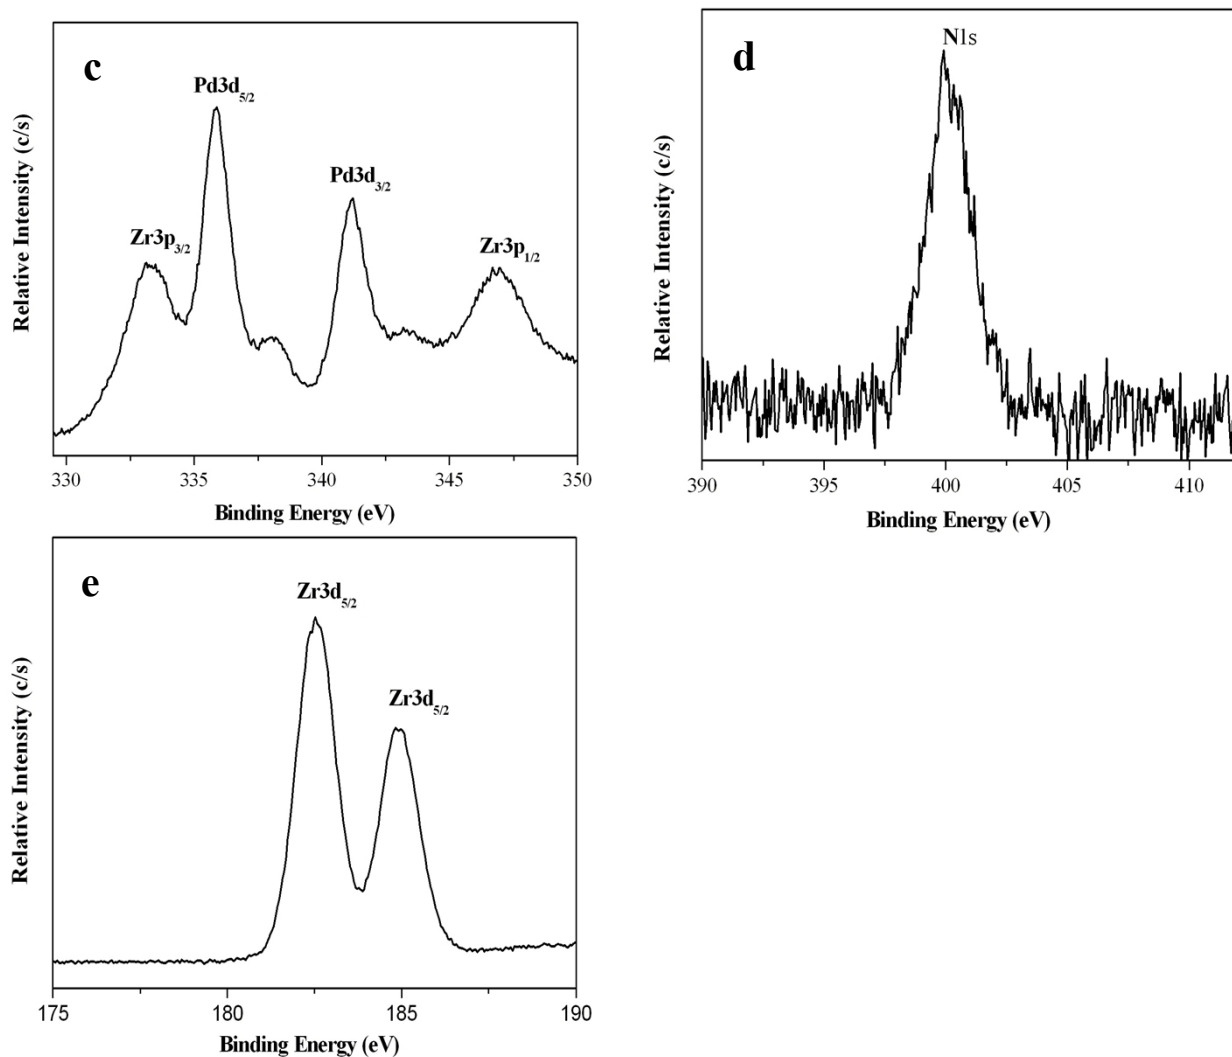

**Figure S5** XPS patterns of  $\text{Ag}_1\text{Pd}_4@\text{NH}_2\text{-UiO-66}$ .

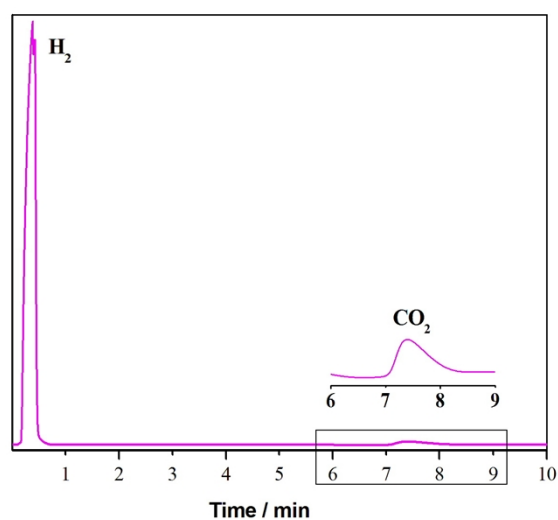

**Figure S6** GC spectrum using TCD for the evolved gas from aqueous FA solution (1.25 M, 1.0 mL) over  $\text{Ag}_1\text{Pd}_4@\text{NH}_2\text{-UiO-66}$  composite at 80 °C ( $n_{\text{metal}} / n_{\text{FA}} = 7.5 \times 10^{-3}$ )

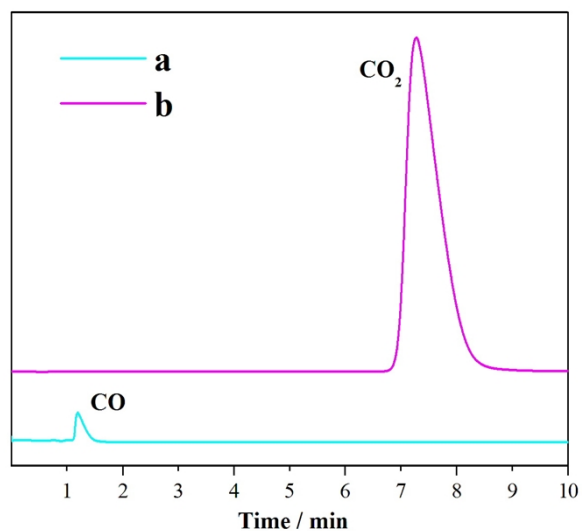

**Figure S7** GC spectrum using FID-Methanator for the (a) commercial pure CO, and (b) evolved gas from FA aqueous solution (1.25 M, 1.0 mL) over  $\text{Ag}_1\text{Pd}_4@\text{NH}_2\text{-UiO-66}$  composite at 80 °C ( $n_{\text{metal}}/n_{\text{FA}} = 7.5 \times 10^{-3}$ ).

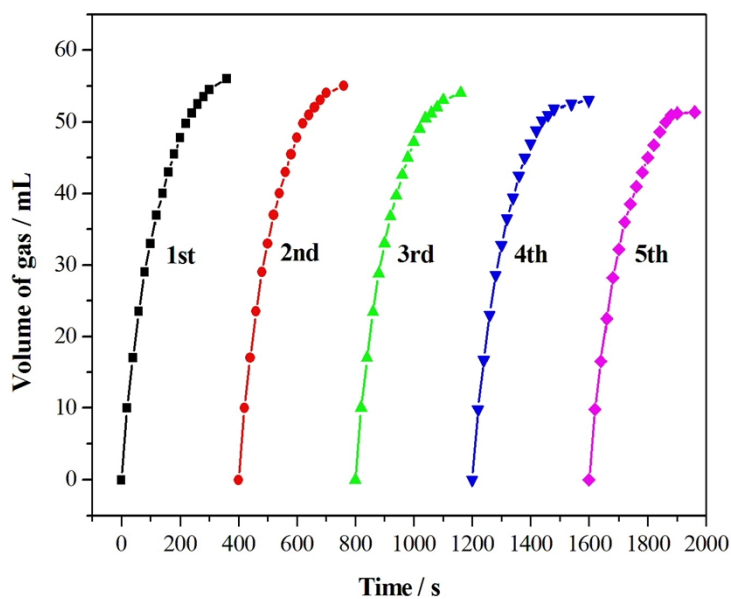

**Figure S8** Stability test on the  $\text{Ag}_1\text{Pd}_4@\text{NH}_2\text{-UiO-66}$  catalyst in the dehydrogenation of 0.42M FA aqueous solution at 80 °C
